# Supplementary material
Source: Springer Nature journal article supplement (https://www.springermedizin.de/resource/supplementary/12865_2013_534_MOESM7_ESM.pdf/9428156)

# A The Effect of sTGF- $\beta$ R Pretreatment on the Generation of E7-Specific CD8<sup>+</sup> T Cells

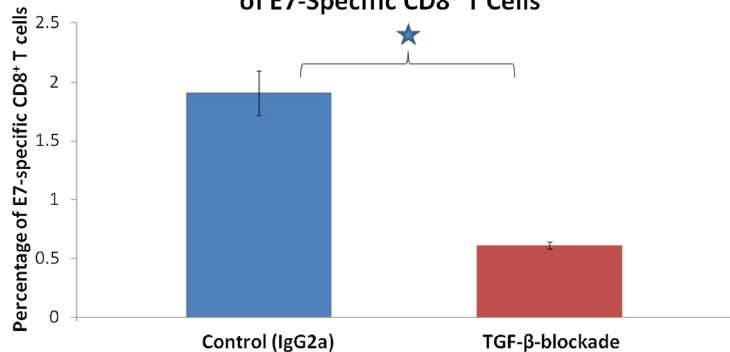

# B Naïve Control IgG2a / Ad.E7 TGF- $\beta$ -blockade / Ad.E7

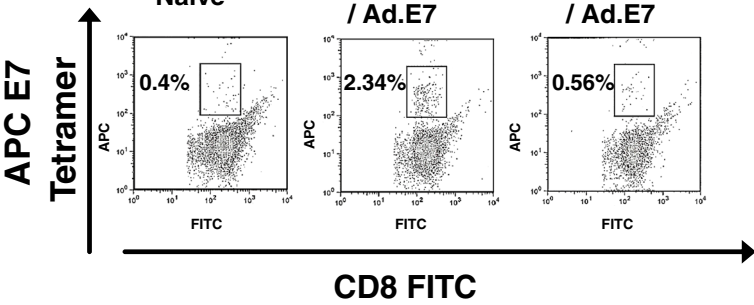

Supplement: MOESM7 [file 9428156]
